# Supplementary material for: A TiSe monolayer as a superior anode for applications of Li/Na/K-ion batteries
Source: Royal Society of Chemistry journal article supplement (doi:10.1039/d3cp02230g), 2023-01-01
Supplement: d3cp02230g1.pdf [file d3cp02230g1.pdf]

## Supporting Information

### TiSe Monolayer as a superior anode for the applications of Li/Na/K-ion batteries

Mengke Wang<sup>1</sup>, Shan Wang<sup>2</sup>, Yunye Liang<sup>1</sup>, Yiqun Xie<sup>1</sup>, Xiang Ye<sup>\*1</sup>, Shoutian,  
Sun<sup>\*1</sup>

<sup>1</sup>Department of Physics, Shanghai Normal University, Shanghai 200234, P. R. China

<sup>2</sup>School of Physics and Electronic Science, East China Normal University, Shanghai  
200062, P. R. China

Email address: yexiang@shnu.edu.cn (Xiang Ye), stsun@shnu.edu.cn (Shoutian Sun)

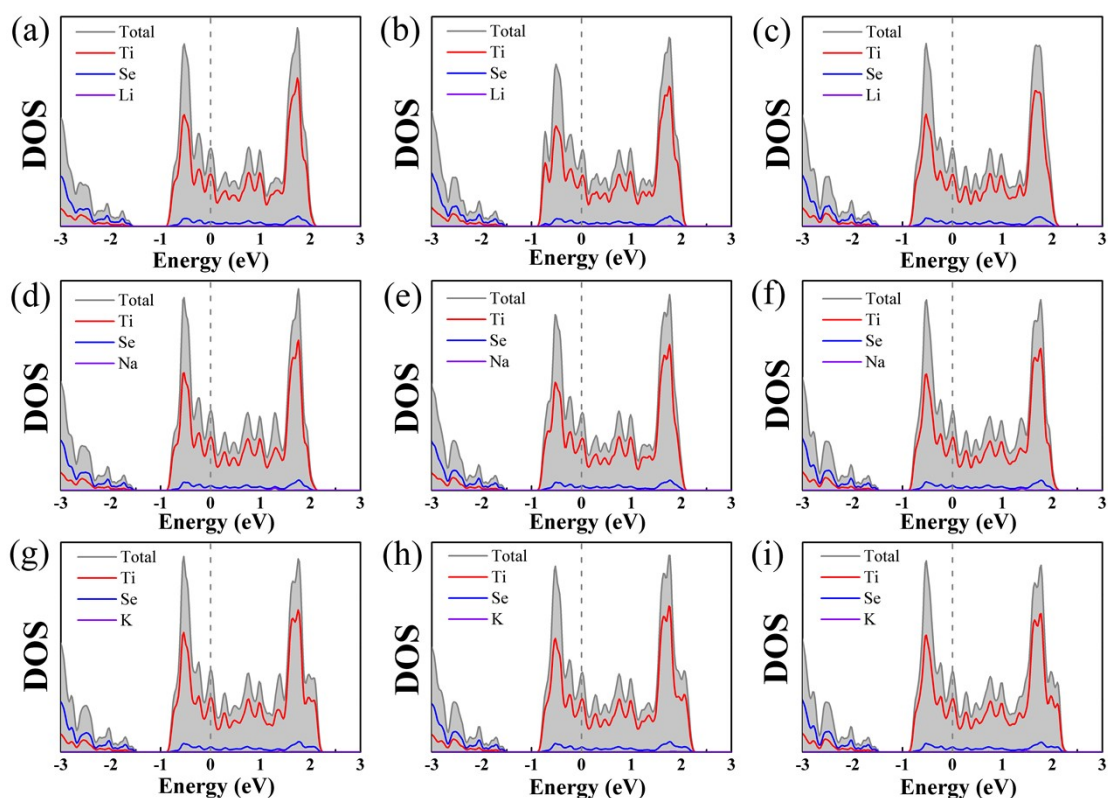

**Fig. S1.** Total and projected DOS of a single Li (a-c), Na (d-f), K (g-i) atom adsorbed onto TiSe for the BG, H, and  $T_{Ti}$  site, with fermi energy level set to 0 eV.

**Table S1.** The distances of alkali metal to the substrate at different adsorption sites.

| Site     | d (Å) |       |       |
|----------|-------|-------|-------|
|          | Li    | Na    | K     |
| $T_{Ti}$ | 1.396 | 1.865 | 2.333 |
| BG       | 1.281 | 1.943 | 2.397 |
| H        | 0.671 | 1.227 | 1.823 |

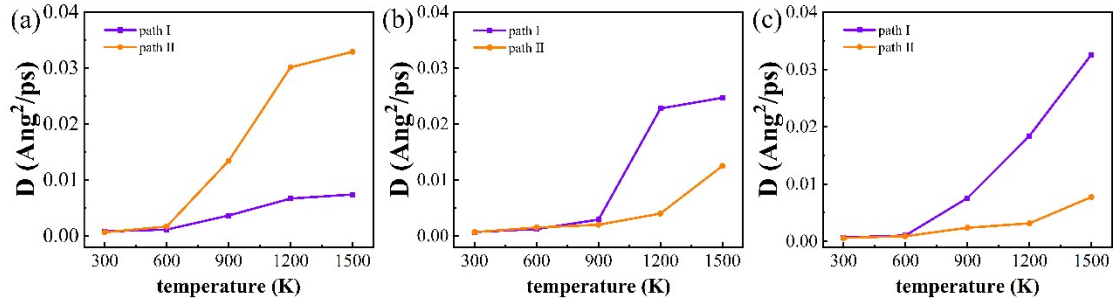

**Fig. S2.** Plots of the diffusion coefficient versus temperature for Li (a), Na (b), K (c) along paths I and II.

To investigate the diffusion of Li/Na/K in the substrate TiSe, AIMD simulation is carried out at different temperatures (300, 600, 900, 1200, 1500 K). We have used a minimum  $\Gamma$ -centered  $1 \times 1 \times 1$   $k$ -point grid. The time step is chosen to be 1 fs and the diffusion simulation is carried out for 10 ps. The diffusion coefficient is given by:

$$D = \lim_{t \rightarrow \infty} \left[ \frac{1}{2dt} \left\langle [r^r(t)]^2 \right\rangle \right]$$

where  $t$  and  $d$  denote time and the dimension of the lattice. The average mean square displacement is calculated by:

$$\langle [r(t)]^2 \rangle = \frac{1}{N} \sum_{i=1}^N \langle [r_i(t+t_0)]^2 - [r_i(t_0)]^2 \rangle$$

where  $N$  is the number of particles, and the square brackets indicate the average of the ensemble.  $r_i(t)$  is the coordinate of particle  $i$  at time  $t$ .

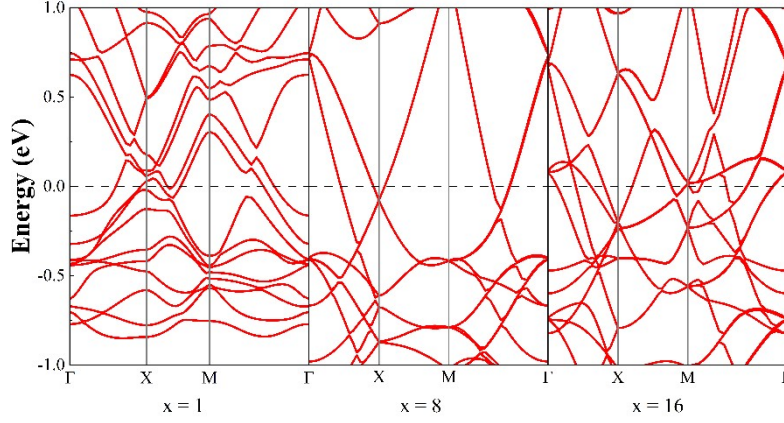

**Fig. S3.** The electronic band structure of the intermediate geometries  $\text{Li}_x(\text{TiSe})_4$  ( $x = 1, 8$  and  $16$ ). The Fermi level is set to zero.

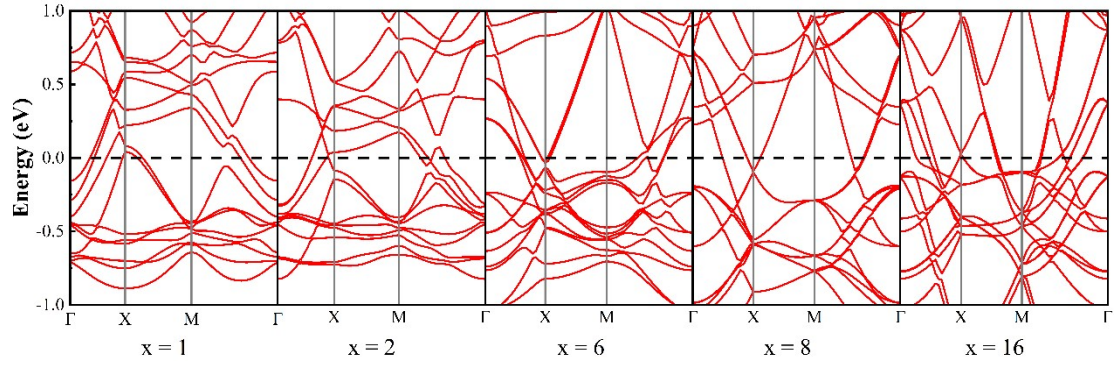

**Fig. S4.** The electronic band structure of the intermediate geometries  $\text{Na}_x(\text{TiSe})_4$  ( $x = 1, 2, 6, 8,$  and  $16$ ). The Fermi level is set to zero.

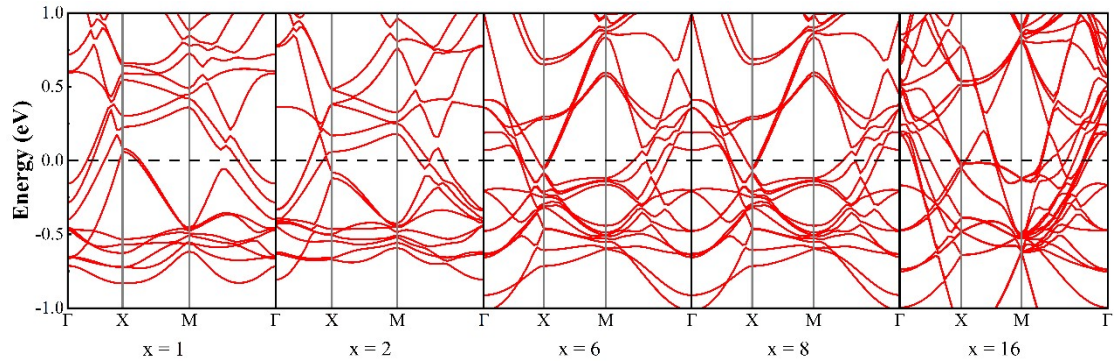

**Fig. S5.** The electronic band structure of the intermediate geometries  $K_x(TiSe)_4$  ( $x = 1, 2, 6, 8,$  and  $16$ ). The Fermi level is set to zero.

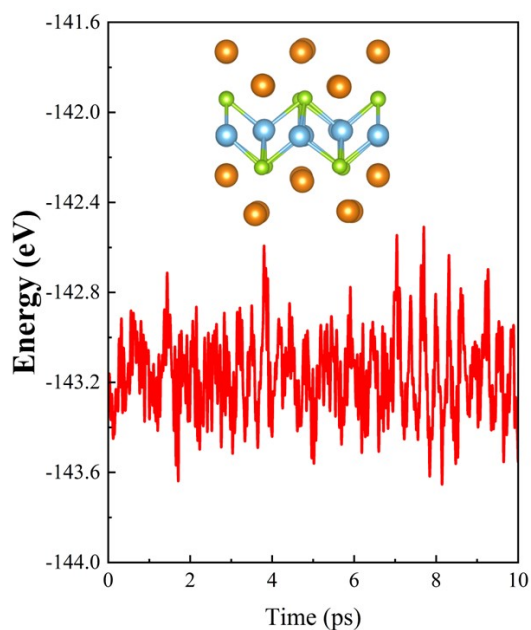

**Fig. S6.** AIMD simulation with 10 ps at 300 K for  $Li_x(TiSe)_4$ . The inset is the snapshot of last step.

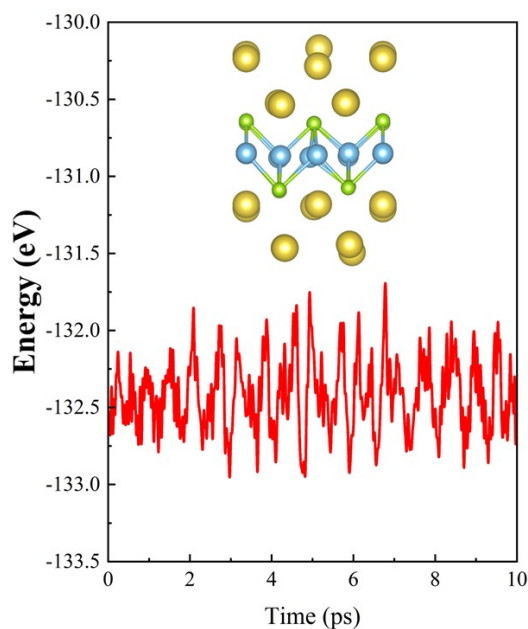

**Fig. S7.** AIMD simulation with 10 ps at 300 K for  $Na_x(TiSe)_4$ . The inset is the snapshot of last step.

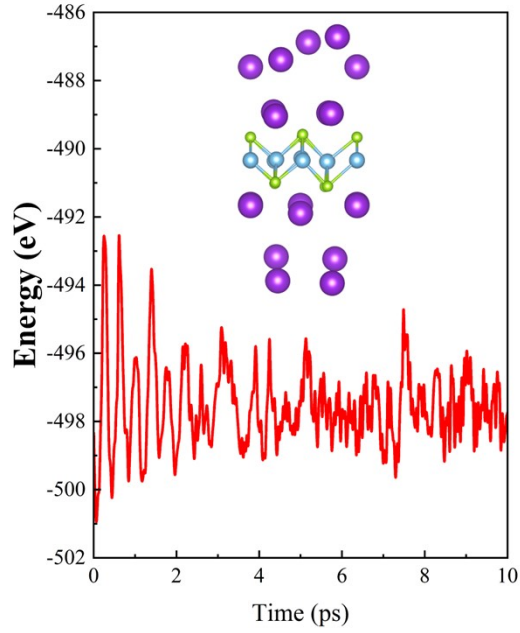

**Fig. S8.** AIMD simulation with 10 ps at 300 K for  $K_x(TiSe)_4$ . The inset is the snapshot of last step.

**Table S2.** The formation energy of alkaline ions added one by one to the TiSe monolayer.

| $N_{ions}$ | $E_{binding}$ (eV) |       |       |
|------------|--------------------|-------|-------|
|            | Li                 | Na    | K     |
| 1          | -1.54              | -1.51 | -1.97 |
| 2          | -1.31              | -1.26 | -1.67 |
| 3          | -1.25              | -1.07 | -1.38 |
| 4          | -1.30              | -1.05 | -1.28 |
| 5          | -1.31              | -1.05 | -1.18 |
| 6          | -1.35              | -1.07 | -1.15 |
| 7          | -1.37              | -1.03 | -1.10 |
| 8          | -1.38              | -1.01 | -1.06 |
| 9          | -1.11              | -0.85 | -0.95 |
| 10         | -0.90              | -0.72 | -0.85 |
| 11         | -0.80              | -0.67 | -0.79 |
| 12         | -0.71              | -0.63 | -0.73 |
| 13         | -0.68              | -0.60 | -0.68 |
| 14         | -0.64              | -0.57 | -0.64 |
| 15         | -0.60              | -0.56 | -0.61 |
| 16         | -0.59              | -0.56 | -0.57 |
